# Supplementary material for: Statistical Analysis of Protein-Ligand Interaction Patterns in Nuclear Receptor RORγ
Source: Front Mol Biosci. 2022 Jun 15;9:904445. doi: 10.3389/fmolb.2022.904445 (PMC9240913; doi:10.3389/fmolb.2022.904445)
Supplement: Supplementary file 1 [file Table1.XLSX]

## Sheet: main
List of 136 PDBs of ROR_gamma and ROR_gammaT
PDB ID	Ligand	Ligand abbreviation	Allosteric binding site	Pubmed ID	ROR_G/ROR_GT, 0 for gamma, 21 for gammaT	substitution/mutation	conformation being active or not based on contact number cutoff 60. a=active, ia= inactive	Ligand formula	m. weight	total atom	heavy atom	NOTES
3B0W	DIGOXIN	DGX:		21733845	0	0	ia	C41 H64 O14:	780	119	55
3KYT	Hydroxycholesterols	HC2:		20203100	0	0	a	C27 H46 O2:	402	75	29
3L0J	Hydroxycholesterols	HC9:		20203100	0	0	a	C27 H46 O2:	402	75	29
3L0L	Hydroxycholesterols	HC3:		20203100	0	0	a	C27 H46 O2:	402	75	29
4NB6	T0901317	444:		24239186	21	0	ia	C17 H12 F9 N O3 S:	481	43	31
4NIE	NBH	NBH:		24900774	0	0	a	C27 H32 N2 O3 S:	464	65	33	An additional ligand DMX at dimer interface to promote the inactive form
4QM0	39K	39K:		25017032	0	0	ia	C23 H27 N O4 S3:	477	58	31
4S14	(3beta,4alpha,5beta,14beta)-3-hydroxy-4-methylcholesta-8,24-diene-4-carboxylic acid	4D8:		25651181	0	0	a	C29 H46 O3:	442	78	32
4WLB	3QQ	3QQ:		25453817	0	0	a	C22 H31 F N4 O4 S2:	498	64	33
4WPF	3SN	3SN:		25815138	0	0	a	C23 H28 F N3 O3 S:	445	59	31
4WQP	3SX	3SX:		25815138	0	0	ia	C24 H33 N3 O3 S:	443	64	31
4XT9	N-[4-(2,5-dichlorophenyl)-5-phenyl-1,3-thiazol-2-yl]-2-[4-(ethylsulfonyl)phenyl]acetamide	43V:		26277758	0	0	a	C25 H20 Cl2 N2 O3 S2:	530	54	34
4YMQ	4-{3-[4-(1,1,1,3,3,3-hexafluoro-2-hydroxypropan-2-yl)benzyl]-2,2-dioxido-2,1,3-benzothiadiazol-1(3H)-yl}-N-[(2R)-4-hydroxybutan-2-yl]-N-methylbutanamide	ZBD:		25840886	0	0	a	C25 H29 F6 N3 O5 S:	597	69	40
4YPQ	MRL-871: 4-{1-[2-chloro-6-(trifluoromethyl)benzoyl]-1H-indazol-3-yl}benzoic acid	4F1:	x	26640126	0	0	ia	C22 H12 Cl F3 N2 O3:	444	43	31
4ZJR	4P3	4P3:		26048806	0	0	ia	C23 H16 Cl2 F4 N2 O3:	514	50	34
4ZJW	4-chloro-3-[1-(2-chloro-6-fluorobenzoyl)-1,2,3,4-tetrahydroquinolin-6-yl]-N-methylbenzamide	4P1:		26048806	0	0	ia	C24 H19 Cl2 F N2 O2:	456	50	31
4ZOM	4Q3	4Q3:		26048789	0	0	ia	C27 H29 Cl F N5 O2:	509	65	36
5APH	25 = N-(2-FLUOROPHENYL)-4-[(4-FLUOROPHENYL)SULFONYL]-2,3,4,5-TETRAHYDRO-1,4-BENZOXAZEPIN-6-AMINE:	VYI:		26553345	0	0	a	C21 H18 F2 N2 O3 S:	416	47	29
5APJ	15 =2-CHLORO-6-FLUORO-N-[4-[3-(TRIFLUOROMETHYL)PHENYL]SULFONYL-3,5-DIHYDRO-2H-1,4-BENZOXAZEPIN-7-YL]BENZAMIDE: SODIUM ION:	76E:		26553345	0	0	a	C23 H17 Cl F4 N2 O4 S:	528	52	35
5APK	15 =2-CHLORO-6-FLUORO-N-[4-[3-(TRIFLUOROMETHYL)PHENYL]SULFONYL-3,5-DIHYDRO-2H-1,4-BENZOXAZEPIN-7-YL]BENZAMIDE:	76E:		26553345	0	0	ia	C23 H17 Cl F4 N2 O4 S:	528	52	35
5AYG	3-[5-(2-cyclohexylethyl)-4-ethyl-1,2,4-triazol-3-yl]-N-naphthalen-1-yl-propanamide	4LQ:		26819660	0	0	ia	C25 H32 N4 O:	404	62	30
5C4O	MRL-871: 4-{1-[2-chloro-6-(trifluoromethyl)benzoyl]-1H-indazol-3-yl}benzoic acid: GLYCEROL: SULFATE ION:	4F1:	x	26640126	0	0	ia	C22 H12 Cl F3 N2 O3:	444	43	31
5C4S	4-{1-[2-chloro-6-(trifluoromethyl)benzoyl]-4-fluoro-1H-indazol-3-yl}-3-fluorobenzoic acid: GLYCEROL:	4Y5:	x	26640126	0	1	ia	C22 H10 Cl F5 N2 O3:	480	43	33
5C4T	(1S)-4-{1-[2-chloro-6-(trifluoromethyl)benzoyl]-4-fluoro-1H-indazol-3-yl}-1-methylcyclohex-3-ene-1-carboxylic acid: GLYCEROL: SULFATE ION:	4Y6:	x	26640126	0	1	ia	C23 H17 Cl F4 N2 O3:	480	50	33
5C4U	4-{1-[2-chloro-6-(trifluoromethyl)benzoyl]-1H-pyrazolo[4,3-b]pyridin-3-yl}-5-fluoro-2-hydroxybenzoic acid: GLYCEROL:	4Y7:	x	26640126	0	0	ia	C21 H10 Cl F4 N3 O4:	479	43	33
5EJV	N-(2,2,2-TRIFLUOROETHYL)-N-{4-[2,2,2-TRIFLUORO-1-HYDROXY-1-(TRIFLUOROMETHYL)ETHYL]PHENYL}BENZENESULFONAMIDE	444:		27080181	0	0	a	C17 H12 F9 N O3 S:	481	43	31
5ETH	1-methyl-~{N}-(1-thiophen-2-ylcarbonyl-3,4-dihydro-2~{H}-quinolin-6-yl)-~{N}-[2,2,2-tris(fluoranyl)ethyl]indole-4-sulfonamide	5RT:		27080181	0	0	ia	C25 H22 F3 N3 O3 S2:	533	58	36
5G42	CT6 = 5-chloranyl-2,3-dihydroindole-1-carboxamide:	4TU:		27432277	0	0	a	C9 H9 Cl N2 O:	196	22	13
5G43	CT16 = 2-(1-PIPERIDINYL)-1,3-THIAZOL-4-AMINE:	5IM:		27432277	0	0	a	C8 H13 N3 S:	183	25	12
5G44	CT23-1 = 8-methoxy-2,3-dimethylquinoxalin-5-ol: CT23-2 = (4-pyrimidin-5-ylphenyl)methanol: CT23-3 = 4-amino-N-(1,3-thiazol-2-yl)benzenesulfonamide:	I6G: SWX: YTZ:		27432277	0	0	a	C11 H12 N2 O2: C11 H10 N2 O: C9 H9 N3 O2 S2:	645	76	45	Cocktail Crystallography: Three ligand fragments instead of one ligand
5G45	CT24 = 8-AMINO-3-QUINOLINOL:	A7W:		27432277	0	0	a	C9 H8 N2 O:	160	20	12
5G46	CT49 = 2-ETHYL-4(1H)-QUINOLINONE: SODIUM ION:	6VD:		27432277	0	0	a	C11 H11 N O:	173	24	13
5IXK	6EW (BIO399) inverse agonist	6EW:		27246200	0	0	ia	C23 H27 F3 N2 O4 S:	484	60	33
5IZ0	6F1 (BIO 592)	6F1:		27246200	0	0	a	C20 H21 F3 N2 O4 S:	442	51	30
5K38				to be published	0	0	ia		0	0	0
5K3L	N-(2,2,2-TRIFLUOROETHYL)-N-{4-[2,2,2-TRIFLUORO-1-HYDROXY-1-(TRIFLUOROMETHYL)ETHYL]PHENYL}BENZENESULFONAMIDE	444:		to be published DOI: 10.2210/pdb5K3L/pdb	0	0	ia	C17 H12 F9 N O3 S:	481	43	31
5K3M	Ursolic acid	6Q5:		to be published DOI: 10.2210/pdb5K3M/pdb	0	0	ia	C30 H48 O3:	456	81	33
5K3N	(3S)-3-(2H-1,3-benzodioxol-5-yl)-1-[(3R,5S)-3,5-dimethylpiperidin-1-yl]-3-(2-hydroxy-4,6-dimethoxyphenyl)propan-1-one	6Q6:		to be published DOI: 10.2210/pdb5K3N/pdb	0	0	ia	C25 H31 N O6:	441	63	32
5K6E	2-chloranyl-6-fluoranyl-~{N}-[(2~{R})-4-(4-fluorophenyl)sulfonyl-2-(hydroxymethyl)-2,3-dihydro-1,4-benzoxazin-6-yl]benzamide	6QP:		to be published DOI: 10.2210/pdb5K6E/pdb	0	0	ia	C22 H17 Cl F2 N2 O5 S:	494	50	33
5K74	~{N}-[[3-methyl-4-(4-methylsulfonylphenyl)phenyl]methyl]-~{N}-(2-methylpropyl)-1-phenyl-methanesulfonamide	6QW:		to be published	0	0	ia	C26 H31 N O4 S2:	485	64	33
5LWP	79U	79U:	x	27815118	0	0	ia	C24 H17 Cl F3 N3 O4:	503	52	35
5M96	~{N}-[8-[[(3~{S})-4-cyclopentylcarbonyl-3-methyl-piperazin-1-yl]methyl]-7-methyl-imidazo[1,2-a]pyridin-6-yl]-2-methyl-pyrimidine-5-carboxamide:	Q6Y:		27902884	0	1	ia	C26 H33 N7 O2:	475	68	35
5NI5	~{N}-[4-(3-chlorophenyl)-5-(2-chlorophenyl)carbonyl-1,3-thiazol-2-yl]-2-(4-ethylsulfonylphenyl)ethanamide: SODIUM ION:	8YB:		30095900	0	0	a	C26 H20 Cl2 N2 O4 S2:	558	56	36
5NI7	~{N}-[4-(5-cyano-2-methoxy-phenyl)thiophen-2-yl]-2-(4-ethylsulfonylphenyl)ethanamide: DIMETHYL SULFOXIDE: SODIUM ION:	8Y8:		30095900	0	0	a	C22 H20 N2 O4 S2:	440	50	30
5NI8	2-(4-ethylsulfonylphenyl)-~{N}-[4-(2-phenylmethoxypyridin-3-yl)thiophen-2-yl]ethanamide: SODIUM ION:	8Y2:		30095900	0	0	a	C26 H24 N2 O4 S2:	492	58	34
5NIB	~{N}-[4-[2-[(3-cyanophenyl)methoxy]pyridin-3-yl]thiophen-2-yl]-2-(4-ethylsulfonylphenyl)ethanamide: DIMETHYL SULFOXIDE: SODIUM ION:	8Y5:		30095900	0	0	a	C27 H23 N3 O4 S2:	517	59	36
5NTI	CHOLEST-5-EN-3-YL HYDROGEN SULFATE:	C3S:		28590087	0	1	a	C27 H46 O4 S:	466	78	32
5NTK	[(3~{S},8~{S},9~{S},10~{R},13~{R},14~{S},17~{R})-10,13-dimethyl-17-[(2~{R})-5-[[4-(2-morpholin-4-ylethoxy)phenyl]methylamino]-5-oxidanylidene-pentan-2-yl]-2,3,4,7,8,9,11,12,14,15,16,17-dodecahydro-1~{H}-cyclopenta[a]phenanthren-3-yl] hydrogen sulfate:	99N:		28590087	0	1	ia	C37 H56 N2 O7 S:	672	103	47
5NTN	(5R,10S,13R,14R,17R)-17-((R,E)-7-hydroxy-6-methylhept-5-en-2-yl)-4,4,10,13,14-pentamethyl-1,2,5,6,10,11,12,13,14,15,16,17-dodecahydro-3H-cyclopenta[a]phenanthrene-3,7(4H)-dione:	98H:		28590087	0	1	a	C30 H46 O3:	454	79	33
5NTP	(S)-N-(5-chloro-3-((4-(cyclopentanecarbonyl)-3-methylpiperazin-1-yl)methyl)-2-methylphenyl)-2-methylpyrimidine-5-carboxamide:	98E:		28590087	0	1	ia	C25 H32 Cl N5 O2:	469	65	33
5NTQ	N-(2,2,2-TRIFLUOROETHYL)-N-{4-[2,2,2-TRIFLUORO-1-HYDROXY-1-(TRIFLUOROMETHYL)ETHYL]PHENYL}BENZENESULFONAMIDE:	444:		28590087	0	1	ia	C17 H12 F9 N O3 S:	481	43	31
5NTW	(S)-N-((5-(ethylsulfonyl)pyridin-2-yl)methyl)-7-isopropyl-6-(((1r,4S)-4-(trifluoromethyl)cyclohexyl)methyl)-6,7-dihydro-5H-pyrrolo[3,4-b]pyridine-3-carboxamide:	98N:		28590087	0	1	a	C27 H35 F3 N4 O3 S:	552	73	38
5NU1	~{N}-[4-(3-chlorophenyl)-5-(2-chlorophenyl)carbonyl-1,3-thiazol-2-yl]-2-(4-ethylsulfonylphenyl)ethanamide:	8YB:		28590087	0	1	a	C26 H20 Cl2 N2 O4 S2:	558	56	36
5UFO	(S)-{4-chloro-2-methoxy-3-[4-(methylsulfonyl)phenyl]quinolin-6-yl}(1-methyl-1H-imidazol-5-yl)[6-(trifluoromethyl)pyridin-3-yl]methanol	87J:		28318945	0	0	ia	C28 H22 Cl F3 N4 O4 S:	602	63	41
5UFR	(S)-[4-chloro-2-(dimethylamino)-3-phenylquinolin-6-yl](1-methyl-1H-imidazol-5-yl)(pyridin-4-yl)methanol	88J:		28318945	0	0	ia	C27 H24 Cl N5 O:	469	58	34
5UHI	(R)-(4-chloro-2-methoxy-3-{[4-(1H-pyrazol-1-yl)phenyl]methyl}quinolin-6-yl)(4-chlorophenyl)(1-methyl-1H-imidazol-5-yl)methanol	8A4:		28318945	0	0	ia	C31 H25 Cl2 N5 O2:	569	65	40
5VB3				28546429	0	0, chimera w CoA	a		0	0	0
5VB5	92A, Na+	92A:		28546429	0	0, chimera w CoA	a	C30 H40 Cl N3 O3:	525	77	37
5VB6	927, Na+	927:		28546429	0	0, chimera w CoA	a	C31 H36 N4 O2:	496	73	37
5VB7	921, Na+	921:		28546429	0	0, chimera w CoA	a	C30 H35 N3 O2:	469	70	35
5VQK	1-(4-fluorophenyl)-7-methoxy-N-{[4-(methylsulfamoyl)phenyl]methyl}-1H-pyrazolo[3,4-c]pyridine-4-carboxamide	9GV:		to be published	0	0	a	C22 H20 F N5 O4 S:	469	53	33
5VQL	5'-(4-cyclopropyl-6-methoxypyrimidin-5-yl)-N-{[4-(ethylsulfonyl)phenyl]methyl}spiro[cyclopentane-1,3'-pyrrolo[3,2-b]pyridine]-1'(2'H)-carboxamide	9GS:		to be published	0	0	a	C29 H33 N5 O4 S:	547	72	39
5W4R	1-{4-[(R)-(4-chloro-2-methoxy-3-{[4-(1H-pyrazol-1-yl)phenyl]methyl}quinolin-6-yl)(hydroxy)(1-methyl-1H-imidazol-5-yl)methyl]piperidin-1-yl}ethan-1-one	9WD:		29079472	0	0	ia	C32 H33 Cl N6 O3:	584	75	42
5W4V	(R)-(4-chloro-2-methoxy-3-{[4-(1H-pyrazol-1-yl)phenyl]methyl}quinolin-6-yl)(1-methyl-1H-imidazol-5-yl)[6-(trifluoromethyl)pyridin-3-yl]methanol:	9WA:		29079472	0	0	ia	C31 H24 Cl F3 N6 O2:	604	67	43
5X8Q	rockogenin=(1R,2S,4S,5'R,6R,7S,8R,9S,10R,12S,13S,16S,18S)-5',7,9,13-tetramethylspiro[5-oxapentacyclo[10.8.0.0^{2,9}.0^{4,8}.0^{13,18}]icosane-6,2'-oxane]-10,16-diol:	82R:		28493531	0	2	ia	C27 H44 O4:	432	75	31
5X8S	Ursolic acid (natural inhibitor UA)	6Q5:		28493531	0	0	ia	C30 H48 O3:	456	81	33
5X8U				28493531	0	0	a		0	0	0
5X8W				28493531	0	2	a		0	0	0
5X8X	compound A=(3R,4R)-4-[4-cyclopropyl-5-[3-(2-methylpropyl)cyclobutyl]-1,2,4-triazol-3-yl]-N-(2,4-dimethylphenyl)-1-ethanoyl-pyrrolidine-3-carboxamide:	82O:		28493531	0	2	ia	C28 H39 N5 O2:	477	74	35
5YP5	2-[4-(ethylsulfonyl)phenyl]-N-{5-[2-(2-methylpropyl)benzoyl]-4-phenyl-1,3-thiazol-2-yl}acetamide	4CZ:		29456799	0	0	a	C30 H30 N2 O4 S2:	546	68	38
5YP6	N-[3'-cyano-4'-(2-methylpropyl)-2-(trifluoromethyl)biphenyl-4-yl]-2-[4-(ethylsulfonyl)phenyl]acetamide	4CX:		29456799	0	0	a	C28 H27 F3 N2 O3 S:	528	64	37
5ZA1	2-[4-({[4-(ethylsulfonyl)phenyl]acetyl}amino)phenyl]-2-methyl-N-phenylpropanamide: DIMETHYLFORMAMIDE: 1,2-ETHANEDIOL:	9A0: DMF: EDO:		30301676	0	0	ia	C26 H28 N2 O4 S:	464	61	33
6A22	2-[2-[1-~{tert}-butyl-5-(4-methoxyphenyl)pyrazol-4-yl]-1,3-thiazol-4-yl]-~{N}-(oxan-4-ylmethyl)ethanamide:	9P6:		30478402	0	2	ia	C25 H32 N4 O3 S:	468	65	33
6B30	N-[(1R)-1-(4-methoxyphenyl)-2-oxo-2-{[4-(trimethylsilyl)phenyl]amino}ethyl]-N-methyl-3-oxo-2,3-dihydro-1,2-oxazole-5-carboxamide	CFG:		29262987	0	0	ia	C23 H27 N3 O5 Si:	453	59	32
6B31	(3S)-N~1~-(3-chloro-4-cyanophenyl)-N~5~-(1,3-diethyl-2,4-dioxo-1,2,3,4-tetrahydroquinazolin-6-yl)-3-methylpentanediamide	CFJ:		29342416	0	0	ia	C25 H26 Cl N5 O4:	495	61	35
6B33	(2R)-N~2~-(3-chloro-4-cyanophenyl)-N~4~-[3-(cyclopropylmethyl)-2,4-dioxo-1-(propan-2-yl)-1,2,3,4-tetrahydroquinazolin-6-yl]morpholine-2,4-dicarboxamide	CF7:		31659845	0	0	ia	C28 H29 Cl N6 O5:	564	69	40
6BN6	2-[(2S)-4-[(4-fluorophenyl)sulfonyl]-7-(1,1,1,3,3,3-hexafluoro-2-hydroxypropan-2-yl)-3,4-dihydro-2H-1,4-benzothiazin-2-yl]-N-(2-hydroxy-2-methylpropyl)acetamide	XGH:		29233651	0	0	ia	C23 H23 F7 N2 O5 S2:	604	62	39
6BR2	(1R)-N-(4-tert-butyl-3-fluorophenyl)-6-methoxy-2-[(3-oxo-2,3-dihydro-1,2-oxazol-5-yl)acetyl]-1,2,3,4-tetrahydroisoquinoline-1-carboxamide	E3S:		29510038	0	0	ia	C26 H28 F N3 O5:	481	63	35
6BR3	E3V, whats MPD?E3V	E3V:		29510038	0	0	ia	C28 H30 F N3 O5:	507	67	37
6CN5	F7M	F7M:		30130103	0	0	ia	C28 H31 N5 O2:	469	66	35
6CN6	3-cyano-N-{3-[1-(cyclopentanecarbonyl)piperidin-4-yl]-1,4-dimethyl-1H-indol-5-yl}benzamide:	F7J:		30130103	0	2	ia	C29 H32 N4 O2:	468	67	35
6CVH	trans-3-({4-(cyclohexylmethyl)-5-[3-(1-methylcyclopropyl)-5-{[(2R)-1,1,1-trifluoropropan-2-yl]carbamoyl}phenyl]-1,3-thiazole-2-carbonyl}amino)cyclobutane-1-carboxylic acid	FJG:		29631962	0	0	ia	C30 H36 F3 N3 O4 S:	591	77	41
6E3E	HQ7	HQ7:		30652849	0	0	ia	C26 H30 F N3 O5:	483	65	35
6E3G	1,2-ETHANEDIOL: (5R)-6-acetyl-2-methoxy-N-{4-[(2-methoxyphenyl)methoxy]phenyl}-5,6,7,8-tetrahydro-1,6-naphthyridine-5-carboxamide:	EDO: HOJ:		30652849	0	0	a	C26 H27 N3 O5:	461	61	34
6ESN	(2~{R})-2-acetamido-~{N}-[4-(5-cyano-3-fluoranyl-2-methoxy-phenyl)thiophen-2-yl]-2-(4-ethylsulfonylphenyl)ethanamide: SODIUM ION:	BWE: NA:		30095900	0	0	a	C24 H22 F N3 O5 S2:	515	57	35
6FGQ	methyl 4-[[3-[5-[2-(4-ethylsulfonylphenyl)ethanoylamino]thiophen-3-yl]pyridin-2-yl]oxymethyl]benzoate:	D9N:		30095900	0	0	ia	C28 H26 N2 O6 S2:	550	64	38
6FZU	~{N}-(3-chloranyl-4-ethoxy-phenyl)ethanamide:	EE8:		29990434	0	1	a	C10 H12 Cl N O2:	213	26	14
6G05	2-(4-ethylsulfonylphenyl)-~{N}-[4-phenyl-5-(phenylcarbonyl)-1,3-thiazol-2-yl]ethanamide:	EF5:		29990434	0	1	a	C26 H22 N2 O4 S2:	490	56	34
6G07	CPD-9 (EEZ)	EEZ:		29990434	0	1	a	C23 H23 Cl N2 O4 S:	458	54	31
6IVX	(4S)-4-[4'-cyclopropyl-5-(2,2-dimethylpropyl)[3,5'-bi-1,2-oxazol]-3'-yl]-6-[(2,4-dichlorophenyl)amino]-6-oxohexanoic acid:	AYO:		30776227	0	2	ia	C26 H29 Cl2 N3 O5:	533	65	36
6J1L	2-[4-(ethylsulfonyl)phenyl]-N-[2'-fluoro-4'-(1,1,1,3,3,3-hexafluoro-2-hydroxypropan-2-yl)[1,1'-biphenyl]-4-yl]acetamide:	B6L:		30964293	0	1	ia	C25 H20 F7 N O4 S:	563	58	38
6J3N	(5beta)-3-oxours-12-en-28-oic acid:	B8F:		to be published	0	0	a	C30 H46 O3:	454	79	33
6NAD	(S)-(4-chloro-2-methoxy-3-{[4-(trifluoromethyl)piperidin-1-yl]methyl}quinolin-6-yl)(1,2-dimethyl-1H-imidazol-5-yl)[2-(trifluoromethyl)pyridin-4-yl]methanol	KHY:		31010722	0	0	ia	C29 H28 Cl F6 N5 O2:	627	71	43
6NWS	2-chloro-6-fluoro-N-(1-{[3-(trifluoromethyl)phenyl]sulfonyl}-2,3-dihydro-1H-indol-6-yl)benzamide	L77:		31172947	0	0	a	C22 H15 Cl F4 N2 O3 S:	498	48	33
6NWT	1,1,1,3,3,3-hexafluoro-2-[2-fluoro-4'-({4-[(pyridin-4-yl)methyl]piperazin-1-yl}methyl)[1,1'-biphenyl]-4-yl]propan-2-ol	L7P:		31172947	0	0	ia	C26 H24 F7 N3 O:	527	61	37
6NWU	6-[(3,5-dichloropyridin-4-yl)methoxy]-1-{[3-(trifluoromethyl)phenyl]sulfonyl}-2,3-dihydro-1H-indole:	L7J:		31172947	0	0	a	C21 H15 Cl2 F3 N2 O3 S:	502	47	32
6O3Z	1,2-ETHANEDIOL: 3-cyano-N-(3-{[(3S)-4-(cyclopentanecarbonyl)-3-methylpiperazin-1-yl]methyl}-5-fluoro-2-methylphenyl)benzamide:	EDO: LKY:		32292560	0	0	a	C27 H31 F N4 O2:	462	65	34
6O98	1-(4-{(3R)-3-[(4-fluorophenyl)sulfonyl]-3-[4-(1,1,1,3,3,3-hexafluoro-2-hydroxypropan-2-yl)phenyl]pyrrolidine-1-carbonyl}piperazin-1-yl)ethan-1-one	L8A:		30891142	21	0	ia	C26 H26 F7 N3 O5 S:	625	68	42
6P9F	trans-4-{(3R)-3-[(4-fluorophenyl)sulfonyl]-3-[4-(1,1,1,2,3,3,3-heptafluoropropan-2-yl)phenyl]pyrrolidine-1-carbonyl}cyclohexane-1-carboxylic acid	O5A:		31257087	0	0	a	C27 H25 F8 N O5 S:	627	67	42
6Q2W	HBW	HBW:		31101472	0	0	ia	C26 H22 Cl2 F3 N5 O4 S:	627	63	41
6Q6M	ethyl (2~{S})-2-[(2-chloranyl-6-methyl-phenyl)-thiophen-2-ylcarbonyl-amino]propanoate:	HJW:		31729873	0	1	ia	C17 H18 Cl N O3 S:	351	41	23
6Q6O	CHOLIC ACID: propan-2-yl (2~{S})-2-[[2,6-bis(chloranyl)phenyl]-(furan-2-ylcarbonyl)amino]propanoate:	CHD: HKE:		31729873	0	1	ia	C17 H17 Cl2 N O4:	369	41	24
6Q7A	1-[2,6-bis(chloranyl)phenyl]-2-(furan-2-yl)-5-methyl-4-(phenylmethyl)imidazole:	HKZ:		31729873	0	1	ia	C21 H16 Cl2 N2 O:	382	42	26
6Q7H	1-[2,4-bis(chloranyl)-3-[2-(5-chloranylfuran-2-yl)-5-methyl-4-(trifluoromethyl)imidazol-1-yl]phenyl]azetidine-3-carboxylic acid:	HL8:		31729873	0	1	ia	C19 H13 Cl3 F3 N3 O3:	493	44	31
6R7A	~{N}-[(1~{R})-1-(4-methoxyphenyl)-2-oxidanylidene-2-[(4-propan-2-ylphenyl)amino]ethyl]-2-oxidanylidene-3~{H}-pyridine-5-carboxamide: SODIUM ION:	JUE: NA:		31223457	0	0	a	C24 H25 N3 O4:	419	56	31
6R7J	(2~{R})-2-acetamido-2-(4-ethylsulfonylphenyl)-~{N}-[4-[1,1,1,3,3,3-hexakis(fluoranyl)-2-oxidanyl-propan-2-yl]phenyl]ethanamide	DMS: JUN: NA:		31223457	0	0	a	C21 H20 F6 N2 O5 S:	526	55	35
6R7K	(2~{R})-2-(4-ethylsulfonylphenyl)-~{N}-[4-[1,1,1,3,3,3-hexakis(fluoranyl)-2-oxidanyl-propan-2-yl]phenyl]-2-(2-phenylethanoylamino)ethanamide: SODIUM ION:	DMS: JUH: NA:		31223457	0	0	a	C27 H24 F6 N2 O5 S:	602	65	41
6SAL	6-cyclohexyloxy-9-ethyl-~{N}-[(4-ethylsulfonylphenyl)methyl]carbazole-3-carboxamide	L3E:	x	31821760	0	1	ia	C22 H13 Cl F3 N3 O3:	459	45	32
6TLM	4-[1-[2,6-bis(chloranyl)phenyl]carbonyl-5-methyl-thieno[3,2-c]pyrazol-3-yl]benzoic acid:	MJE:	x	32053744	0	0	ia	C20 H12 Cl2 N2 O3 S:	430	40	28
6U25	GLYCEROL: trans-4-[(3aR,9bR)-9b-[(4-fluorophenyl)sulfonyl]-7-(1,1,1,2,3,3,3-heptafluoropropan-2-yl)-1,2,3a,4,5,9b-hexahydro-3H-benzo[e]indole-3-carbonyl]cyclohexane-1-carboxylic acid:	O5B:		31638797	0	0	a	C29 H27 F8 N O5 S:	653	71	44
6UCG	(3S,4R)-1-[1-(2-chloro-6-cyclopropylbenzene-1-carbonyl)-4-fluoro-1H-indazol-3-yl]-3-hydroxypiperidine-4-carboxylic acid:	Q3Y:	x	32071676	0	0	ia	C23 H21 Cl F N3 O4:	457	53	32
6VQF	(1R,3S,4R)-4-[(3aR,9bR)-9b-[(4-fluorophenyl)sulfonyl]-7-(1,1,1,2,3,3,3-heptafluoropropan-2-yl)-1,2,3a,4,5,9b-hexahydro-3H-benzo[e]indole-3-carbonyl]-3-methylcyclohexane-1-carboxylic acid:	R7V:		32551004	0	0	a	C30 H29 F8 N O5 S:	667	74	45
6VSW	5-(2,3-dichloro-4-{[(2S)-1,1,1-trifluoropropan-2-yl]sulfamoyl}phenyl)-4-(4-fluoropiperidine-1-carbonyl)-N-(2-hydroxy-2-methylpropyl)-1,3-thiazole-2-carboxamide:	RG7:		32336498	0	0	ia	C23 H26 Cl2 F4 N4 O5 S2:	648	66	40
6W9H	4-{(3R)-3-[4-(benzyloxy)phenyl]-3-[(4-fluorophenyl)sulfonyl]pyrrolidine-1-carbonyl}-1lambda~6~-thiane-1,1-dione:	TKJ:		32334911	0	0	a	C29 H30 F N O6 S2:	571	69	39
6W9I	1-(benzyloxy)-4-{1-[(4-fluorophenyl)sulfonyl]cyclopentyl}benzene:	Z7D:		32334911	0	0	a	C24 H23 F O3 S:	410	52	29
6XAE	trans-4-{(3aR,9bR)-7-[(2-chloro-6-fluorophenyl)methoxy]-9b-[(4-fluorophenyl)sulfonyl]-1,2,3a,4,5,9b-hexahydro-3H-benzo[e]indole-3-carbonyl}cyclohexane-1-carboxylic acid	Z7F:		32334911	0	0	a	C33 H32 Cl F2 N O6 S:	643	76	44
6XFV	1-(4-{(3S,4S)-4-[4-(1,1,1,3,3,3-hexafluoro-2-hydroxypropan-2-yl)phenyl]-3-methyl-3-phenylpyrrolidine-1-carbonyl}piperidin-1-yl)ethan-1-one	V27:		32738966	0	0	ia	C28 H30 F6 N2 O3	556	69	39
7JH2	2-({[2-(4-{(3R)-1-(4-acetylpiperazine-1-carbonyl)-3-[(4-fluorophenyl)sulfonyl]pyrrolidin-3-yl}phenyl)-1,1,1,3,3,3-hexafluoropropan-2-yl]oxy}methyl)-3-fluorobenzonitrile	VBG:		32736080	0	0	ia	C34 H30 F8 N4 O5 S	758	82	52
6LO9	6-cyclohexyloxy-9-ethyl-~{N}-[(4-ethylsulfonylphenyl)methyl]carbazole-3-carboxamide	ENU:		to be published	0	0	a	C30 H34 N2 O4 S	518	71	37
6LOA	9-ethyl-~{N}-[(4-ethylsulfonylphenyl)methyl]-6-propan-2-yloxy-carbazole-3-carboxamide	ENR:		to be published	0	0	a	C27 H30 N2 O4 S	478	64	34
6LOB	9-ethyl-~{N}-[(4-ethylsulfonylphenyl)methyl]carbazole-3-carboxamide	EO0:		to be published	0	0	a	C24 H24 N2 O3 S	420	54	30
6LOC	6-cyclobutyloxy-9-ethyl-~{N}-[(4-ethylsulfonylphenyl)methyl]carbazole-3-carboxamide	EKL:		to be published	0	0	a	C28 H30 N2 O4 S	490	65	35
7KXD	{3,5-dichloro-4-[4-methoxy-3-(propan-2-yl)phenoxy]phenyl}methanol	Z7G:		33422603	0	0	a	C17 H18 Cl2 O3	340	40	22
7KXE	N-{3,5-dichloro-4-[4-methoxy-3-(propan-2-yl)phenoxy]phenyl}-2-(pyridin-3-yl)acetamide	Z7H:		33422603	0	0	a	C23 H22 Cl2 N2 O3	444	52	30
7KXF	N-(3,5-dichloro-4-{[6-methoxy-5-(propan-2-yl)pyridin-3-yl]oxy}phenyl)-2-[1-(methylsulfonyl)piperidin-4-yl]acetamide	Z7I:		33422603	0	0	a	C23 H29 Cl2 N3 O5 S	529	53	34
6SLZ	(2~{S})-1-[2,4-bis(chloranyl)-3-[[2-methyl-4-(trifluoromethyl)quinolin-8-yl]oxymethyl]phenyl]carbonyl-~{N}-methyl-pyrrolidine-2-carboxamide	LK8:		to be published	0	0	ia	C25 H22 Cl2 F3 N3 O3	539	58	36
7JYM	(3R,5S)-3-fluoro-5-[(3aR,9bR)-9b-[(4-fluorophenyl)sulfonyl]-7-(1,1,1,2,3,3,3-heptafluoropropan-2-yl)-1,2,3a,4,5,9b-hexahydro-3H-benzo[e]indole-3-carbonyl]-1-(2-hydroxy-2-methylpropyl)pyrrolidin-2-one	Z8I:		33335675	0	0	a	C30 H29 F9 N2 O5 S	700	76	47
7JTM	trans-4-[(3aR,9bR)-8-cyano-9b-[(4-fluorophenyl)sulfonyl]-7-(1,1,1,2,3,3,3-heptafluoropropan-2-yl)-1,2,3a,4,5,9b-hexahydro-3H-benzo[e]indole-3-carbonyl]cyclohexane-1-carboxylic acid	VK7:		32882417	0	0	a	C30 H26 F8 N2 O5 S	678	72	46
7KQJ	N-[(3R,3aS,9bS)-9b-[(4-fluorophenyl)sulfonyl]-7-(1,1,1,2,3,3,3-heptafluoropropan-2-yl)-2,3,3a,4,5,9b-hexahydro-1H-cyclopenta[a]naphthalen-3-yl]-2-hydroxy-2-methylpropanamide	Z8G:		33591748	0	0	a	C26 H25 F8 N O4 S	599	65	40
7JTW	(4R)-6-[(2,5-dichloro-3-{[(2R,4R)-1-(cyclopentanecarbonyl)-2-methylpiperidin-4-yl]oxy}phenyl)amino]-6-oxo-4-phenylhexanoic acid	VK4:		33493627	0	0	a	C30 H36 Cl2 N2 O5	574	75	39
7KCO	1-[(2-chlorophenyl)methyl]-N-{[4-(methylsulfonyl)phenyl]methyl}-4',5'-dihydrospiro[piperidine-4,7'-thieno[2,3-c]pyran]-2'-carboxamide	WB7:		33852312	0	0	a	C27 H29 Cl N2 O4 S2	544	65	36
7LUK	(2S)-N-[(6aS,7R,9aS)-9a-[(4-fluorophenyl)sulfonyl]-3-(1,1,1,2,3,3,3-heptafluoropropan-2-yl)-6,6a,7,8,9,9a-hexahydro-5H-cyclopenta[f]quinolin-7-yl]-2-hydroxy-2-methyl-3-(methylsulfonyl)propanamide	YDY:		34055233	0	0	a	C26 H26 F8 N2 O6 S2	678	70	44
7NEC	4-[[3-[2-chloranyl-6-(trifluoromethyl)phenyl]-5-(1~{H}-pyrrol-2-yl)-1,2-oxazol-4-yl]methoxy]benzoic acid	U95:		34008974	0	1	ia	C22 H14 Cl F3 N2 O4	462	46	32
7NP5	4-[[3-[2-chloranyl-6-(trifluoromethyl)phenyl]-5-(1~{H}-pyrrol-3-yl)-1,2-oxazol-4-yl]methoxy]-2-fluoranyl-benzoic acid	UKB:		34008974	0	1	ia	C22 H13 Cl F4 N2 O4	480	46	33
7NP6	4-[[3-[2-chloranyl-6-(trifluoromethyl)phenyl]-5-(1~{H}-pyrazol-4-yl)-1,2-oxazol-4-yl]methoxy]benzoic acid	UK8:		34008974	0	1	ia	C21 H13 Cl F3 N3 O4	463	45	32
7NPC	4-[[3-[2-chloranyl-6-(trifluoromethyl)phenyl]-5-(1~{H}-pyrrol-3-yl)-1,2-oxazol-4-yl]methoxy]benzoic acid	ULT:		34008974	0	1	ia	C22 H14 Cl F3 N2 O4	462	46	32
The following are 12 double-ligand complexes: one bound at the "O" site and the other at the "A" site
6T4G	O=CLR A=L3E		x	33536342
6T4I	O=CLR A=4F1		x	33536342
6T4J	O=MHQ A=L3E		x	33536342
6T4K	O=MHQ A=4F1		x	33536342
6T4T	O=HCD A=L3E		x	33536342
6T4U	O=HCD A=4F1		x	33536342
6T4W	O=HCD A=MJE		x	33536342
6T4X	O=HC3 A=L3E		x	33536342
6T4Y	O=HC3 A=4F1		x	33536342
6T50	O=HC3 A=MJE		x	33536342
6TLQ	O=CLR A=MJE		x	33536342
6TLT	O=MHQ A=MJE		x	33536342
	Here "Allosteric" ligands have appeared in other PDBs: L3E (PDB:6SAL), 4F1 (PDB: 4YPQ/5C4O) and MJE (PDB: 6TLM)
	Here "Orthosteric" ligands are CLR, MHQ, HCD, and HC3 (PDB:3L0L)
	HCD = C27 H46 O2 (similar to HC2 of PDB:3KYT, but -OH in vs out)
	CLR = C27 H46 O
	MHQ =C27 H44 O
